# Supplementary material
Source: MDPI journal article supplement (https://www.mdpi.com/2410-3888/4/4/54)
Supplement: s1 [file s1]

# Supplementary Material: Vitellogenesis in the Blue Gourami is Accompanied by Brain Transcriptome Changes

Gad Degani <sup>1,2</sup>, Amir Alon <sup>2,3</sup>, Akram Hajouj <sup>2</sup> and Ari Meerson <sup>1,2,\*</sup>

**Table S1.** Genes differentially expressed in PVTL/HVTL (as in Figure 2A) and their putative functions.

| Upregulated in HVTL |                                                                                |                                                                                                                                                                                                                                                                                                                                                                                 |
|---------------------|--------------------------------------------------------------------------------|---------------------------------------------------------------------------------------------------------------------------------------------------------------------------------------------------------------------------------------------------------------------------------------------------------------------------------------------------------------------------------|
| Gene ID             | Gene Name                                                                      | GenBank Function                                                                                                                                                                                                                                                                                                                                                                |
| RL36                | ribosomal protein 36 60S large ribosomal subunit                               | Component of the large ribosomal subunit                                                                                                                                                                                                                                                                                                                                        |
| YWHAE (1433E)       | tyrosine 3-monooxygenase/tryptophan 5-monooxygenase activation protein epsilon | 1. Monooxygenase activity<br>2. Protein domain specific binding                                                                                                                                                                                                                                                                                                                 |
| TSN8                | Tetraspanin-8                                                                  | integrin binding                                                                                                                                                                                                                                                                                                                                                                |
| TMEM59L             | Transmembrane protein 59 like                                                  | Modulates the O-glycosylation and complex N-glycosylation steps occurring during the Golgi maturation of APP. Inhibits APP transport to the cell surface and further shedding GTPase-activating protein (GAP) that stimulates the GTPase activity of Rho-type GTPases. Thereby, controls Rho-type GTPases cycling between their active GTP-bound and inactive GDP-bound states. |
| RHG44               | rho GTPase-activating protein 44-like                                          | Microtubule minus-end binding protein that acts as a regulator of non-centrosomal microtubule dynamics and organization. Specifically required for the biogenesis and maintenance of zonula adherens by anchoring the minus-end of microtubules to zonula adherens and by recruiting the kinesin KIFC3 to those junctional sites.                                               |
| CAMP3               | Calmodulin-regulated spectrin-associated protein 3                             | Involved in cell growth regulation. May be involved in the regulation of mitogenic signals and control of cell proliferation. Involved in the internalization of ligand-inducible receptors of the receptor tyrosine kinase (RTK) type, in particular EGFR.                                                                                                                     |
| EPS15               | Epidermal growth factor receptor pathway substrate 15                          | Binds to F-actin and exhibits pH-sensitive F-actin depolymerizing activity. Regulates actin cytoskeleton dynamics. Important for normal progress through mitosis and normal cytokinesis.                                                                                                                                                                                        |
| COF1                | Cofilin                                                                        | RNA polymerase II core promoter proximal region sequence-specific DNA binding; RNA polymerase II transcription factor activity, sequence-specific DNA binding; Transcription coactivator activity, transcription factor binding                                                                                                                                                 |
| JUNB                | JunB proto-oncogene, AP-1 transcription factor subunit                         | Recognizes and binds the palindromic sequence 5'-TTGGCNNNNNGCCAA-3' present in viral and cellular promoters and in the origin of replication of adenovirus type 2. These proteins are individually capable of activating transcription and replication.                                                                                                                         |
| NFIC                | Nuclear factor I C                                                             | DNA binding, Protein heterodimerization activity                                                                                                                                                                                                                                                                                                                                |
| H2B1                | Histone H2B-like                                                               | RNA binding                                                                                                                                                                                                                                                                                                                                                                     |
| STAU2               | Staufen double-stranded RNA binding protein 2                                  |                                                                                                                                                                                                                                                                                                                                                                                 |
| EFNA3               | Ephrin A3                                                                      | Binds promiscuously Eph receptors residing on adjacent cells, leading to contact-dependent bidirectional signaling into neighboring cells.                                                                                                                                                                                                                                      |
| RGRF1               | Ras Protein Specific Guanine Nucleotide Releasing Factor 1                     | Promotes the exchange of Ras-bound GDP by GTP.                                                                                                                                                                                                                                                                                                                                  |
| Upregulated in PVTL |                                                                                |                                                                                                                                                                                                                                                                                                                                                                                 |
| CERS6               | Ceramide synthase 6                                                            | DNA binding                                                                                                                                                                                                                                                                                                                                                                     |
| CERS5               | Ceramide synthase 5                                                            | Dihydroceramide synthase. Catalyzes the acylation of sphingosine to form dihydroceramide.                                                                                                                                                                                                                                                                                       |
| Rtn4rl1             | Reticulon-4 receptor-like 2                                                    | Cell surface receptor. Plays a functionally redundant role in postnatal brain development and in regulating axon regeneration in the adult central nervous system. Contributes to normal axon migration across the brain midline and normal formation of the corpus callosum. Protects motoneurons against apoptosis.                                                           |
| ARX                 | Aristaless related homeobox                                                    | Appears to be indispensable for central nervous system development. May play a role in the neuronal differentiation of the ganglionic eminence and ventral thalamus. May also be involved in axonal guidance in the floor plate.                                                                                                                                                |
| UNC80               | unc-80 homolog, NALCN activator                                                | Component of the NALCN sodium channel complex, required for channel regulation. UNC80 is essential for NALCN sensitivity to extracellular calcium.                                                                                                                                                                                                                              |
| PHOP1               | Probable phosphatase phospho1                                                  | Probable phosphatase, involved in bone mineralization                                                                                                                                                                                                                                                                                                                           |
| ATP1B2              | ATPase Na <sup>+</sup> /K <sup>+</sup> Transporting Subunit Beta 2             | This is the non-catalytic component of the active enzyme, which catalyzes the hydrolysis of ATP coupled with the exchange of Na <sup>+</sup> and K <sup>+</sup> ions across the plasma membrane. The exact function of the beta-2 subunit is not known.                                                                                                                         |

| Upregulated in HVTL |                                          |                                                                                                                                                                                                                                              |
|---------------------|------------------------------------------|----------------------------------------------------------------------------------------------------------------------------------------------------------------------------------------------------------------------------------------------|
| Gene ID             | Gene Name                                | GenBank Function                                                                                                                                                                                                                             |
| IQEC3               | IQ Motif and Sec7 Domain 3               | Acts as a guanine nucleotide exchange factor (GEF) for ARF1                                                                                                                                                                                  |
| ROBO2               | Roundabout guidance receptor 2           | Anterior/posterior axon guidance; Central nervous system projection neuron axonogenesis; Negative regulation of axon extension involved in axon guidance                                                                                     |
| MBNL1               | Muscleblind like splicing regulator 1    | Metal ion binding                                                                                                                                                                                                                            |
| CRY1                | Cryptochrome-1                           | Transcriptional repressor that forms a core component of the circadian clock                                                                                                                                                                 |
| RGRF2               | Ras guanine nucleotide exchange factor 2 | Functions as a calcium-regulated nucleotide exchange factor activating both Ras and rac1 through the exchange of bound GDP for GTP. May function in synaptic plasticity.                                                                     |
| DLX5                | Distal-less homeobox 5                   | Transcriptional factor involved in bone development. Acts as an immediate early BMP-responsive transcriptional activator essential for osteoblast differentiation.                                                                           |
| ZEP1                | Zeaxanthin epoxidase                     | Converts zeaxanthin into antheraxanthin and subsequently violaxanthin.                                                                                                                                                                       |
| CLSTN3              | Calsyntenin 3                            | May modulate calcium-mediated postsynaptic signals. Complex formation with APBA2 and APP, stabilizes APP metabolism and enhances APBA2-mediated suppression of beta-APP40 secretion, due to the retardation of intracellular APP maturation/ |
| AHSG                | (FETUA) alpha 2-HS glycoprotein          | Probably involved in differentiation.                                                                                                                                                                                                        |
| AAK1                | AP2 associated kinase 1                  | Regulates clathrin-mediated endocytosis by phosphorylating the AP2M1/mu2 subunit of the adaptor protein complex 2 (AP-2). which ensures high affinity binding of AP-2 to cargo membrane proteins during the initial stages of endocytosis    |
| EOMES               | Eomesodermin                             | Functions as a transcriptional activator playing a crucial role during development. Functions in gastrulation, regulating mesoderm differentiation. Activates wnt8, t/bra, chrd and mix-A/mix.1 expression.                                  |

Table S2. Blue gourami receptor gene sequences.

| Gene name                                          | Trichogaster trichopterus sequences                                                                                                                                                                                                                                                                                                                                                                                                                                                                                                                                                                                                                       |
|----------------------------------------------------|-----------------------------------------------------------------------------------------------------------------------------------------------------------------------------------------------------------------------------------------------------------------------------------------------------------------------------------------------------------------------------------------------------------------------------------------------------------------------------------------------------------------------------------------------------------------------------------------------------------------------------------------------------------|
| Gonadotropin-releasing hormone II receptor (GnRHR) | TTTCACTCAGTGTGCCACTCATGGCAGCTTCAGCCGCCGCTGGCAGGAGACTCTTTACAACATGT<br>TTTACTTCACCACGCTGTATGTTGTTCCCTGCTGGTGATGAGCTGCTGCTACAGCCGCATCCTGC<br>TGCACATCCACAAGCAGCACCTGAGGAACAAAGCGGGCGAGTCTTACCTGCGCCGCAGCGGCA<br>CTGATATTATCCCAAAGGCCCGGATGAAGACCCTGAAGATGACGGTGGTCATCGTGCTTTCCTTT<br>CTGGTTTGTGGACTCCTTACTACCTTCTGGGAATCTGGTACTGGTTCAGCCCCGACATGCTGCGC<br>ATCACACCCGAGTATGTGCACCACGCCCTCTTTGTGTTGGGAACCTGAACACCTGCTAAC                                                                                                                                                                                                                                       |
| Membrane progesterin receptor epsilon (mPR)        | TTTACATCCCGAGCGCTTGTGTTGTAGCAATCATCTGTGCTCTGCTGCTGCAACACTCGCCAGA<br>AGTGGAGGCAGCATCGGTACATTATCCGGACCCTGGTTTCTCTCCCGTTCCTCATTTCCTCCA<br>CGCCCGTGTCTACCGCTCCTAACAGATCGCCTTATTCCACCACCTCGTCTCTCTTGCCGCAT<br>CCACTGCCATGTCCACGTTTTTTATCGCCACTGCTTCTGGCTGCTGGTTTCAGCTGTCTTTAACAT<br>CAGCAAAGTGCCTGAGCGGCTGGCCCCAGTGCCTTTGACATCTGGGGGCACAGCCACCAGTGG<br>TTCCACTGCTGCACATTTCTGTCCATCCTGGATGAACCTCACATGATCAAGAGTGAGGTGAGAGC<br>CATCCTGCTCAGCTCGACTCTGCTGCTGCCCCCGCCACCCTCTCTGCTGCTGCTGACCTACCAT<br>AGCTTCCACCTACGGGGTGATGCTGCTCCTCCAGACTACCATCATCTCCATCATTATGTGGTTTCG<br>CATGGTGTGCCAACTGCATCTACGGACCTCAGATTGATCAGCTAGCAAAGGAACACCCCAAAA<br>AATACCTGAAGTGTCACACAT |
| G-protein coupled receptor 54 (GPCR)               | TGCTTGTGCGACTCGTGGGCAATTCCTGGTTATCTATGTCATCTCCAAACACAGGCAATGAGG<br>ACGGCCACCAACTTCTACATAGCAAACCTGGCTGCCACCGACATCATCTTCTTGGTGTGCTGCGT<br>CCCCTTACCGCCACCCCTCTATCCCTCCCTGGATGGATCTTTGGCAATTTTCATGTGCAAATTTGT<br>CGCCTTTTACAGCAGGTAACACCGTGATTCATGTATCTGCTATC                                                                                                                                                                                                                                                                                                                                                                                                |

Table S3. Blue gourami receptor gene primer sequences.

| Short Name | Gene Name                                   | Direction | Sequence             |
|------------|---------------------------------------------|-----------|----------------------|
| GPCR       | G-protein coupled receptor 54               | Forward   | CATCTTCTTGGTGTGCTGCG |
|            |                                             | Reverse   | TGATACAGGTGGCTTGGACG |
| mPR        | Membrane progesterone receptor epsilon(mPR) | Forward   | GGAGGCAGCATCGGTACATT |
|            |                                             | Reverse   | ACGAGGTGGTGAATAAGGC  |
| GnRHR      | Gonadotropin releasing hormone receptor     | Forward   | CGCTGTATGTTGTTCCCTG  |
|            |                                             | Reverse   | GCAGCCACCTCTTACCTTTG |
